# Supplementary material
Source: MDPI journal article supplement (https://www.mdpi.com/2071-1050/14/20/13055)

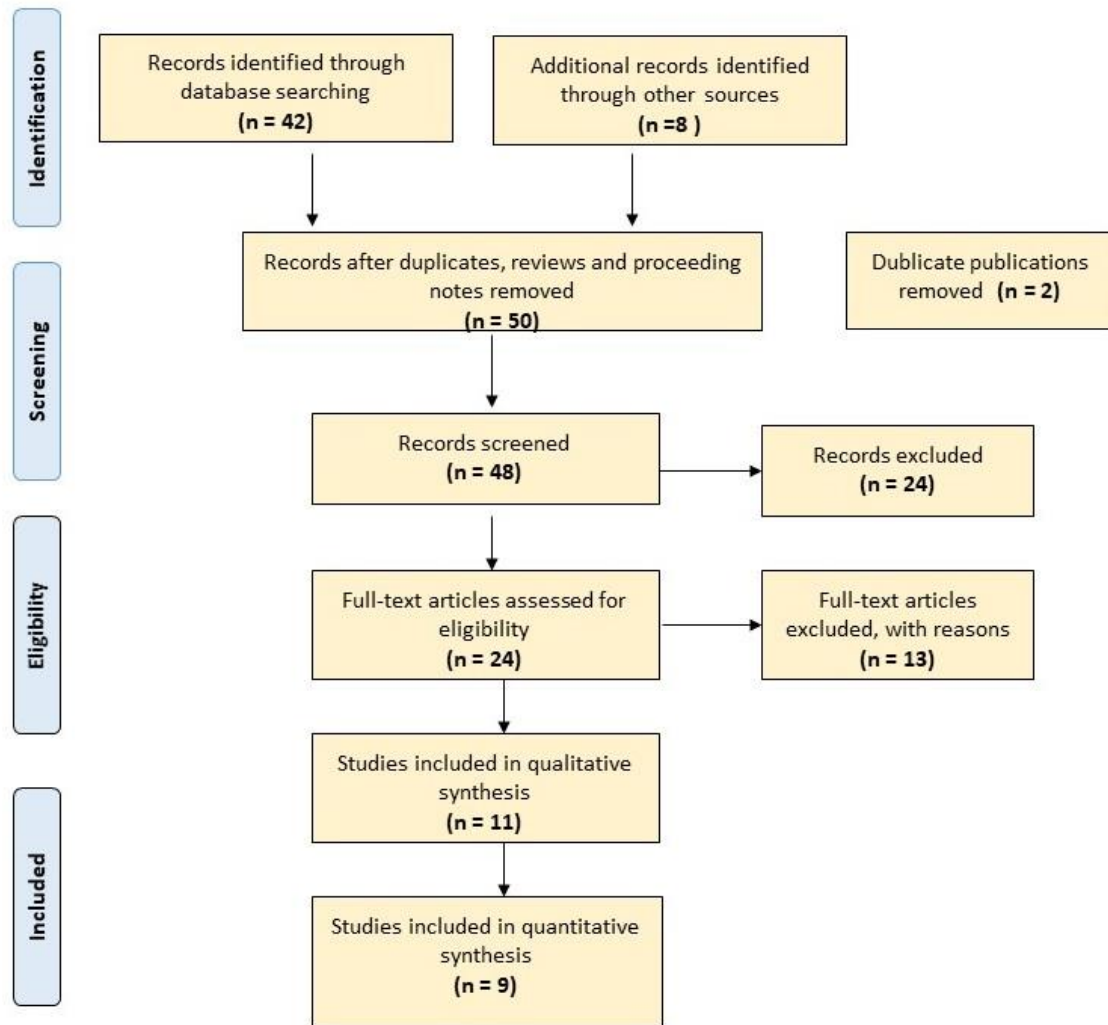

**Figure S1.** PRISMA flow diagram of the current literature synthesis on carbon sequestration.

Supplement: s1 [file s1]
